# Supplementary material for: Identification and Characterization of Heme Oxygenase-1 from Litopenaeus vannamei Involved in Antioxidant and Anti-Apoptosis under Ammonia Stress
Source: MDPI journal article supplement (doi:10.3390/fishes7060356), 2022-11-28
Supplement: s1 [file s1]

| Genes                | Primer Name    | Sequence (5'–3')        |
|----------------------|----------------|-------------------------|
| RACE                 |                |                         |
| HO-1                 | HO-1-S         | ATGTCTTCCACTGAAGAGGTGC  |
|                      | HO-1-A         | TTACCCTACTAGCATCCTCTTAA |
|                      |                | TG                      |
|                      | HO-1-5'        | GCTGCTTCGTCTCCTCATCG    |
|                      | HO-1-5' nested | CCCTTGGCTTGTATCCGTCCT   |
|                      | HO-1-3'        | AGGACGGATAACAAGCCAAGGG  |
| dsRNA<br>preparation | HO-1-3' nested | GAAGGACGGATAACAAGCCAAG  |
|                      |                | G                       |
|                      | dsHO-1-F       | GGATAGACTCTCACACACCCTT  |
|                      |                | A                       |
|                      | dsHO-1-R       | GTCCTTCCACTGAGTGAACAA   |
|                      |                | T                       |
| EGFP                 | dsHO-1-T7F     | TAATACGACTCACTATAGGGAG  |
|                      |                | GGATAGACTCTCACACACCCTT  |
|                      |                | A                       |
|                      | dsHO-1-T7R     | TAATACGACTCACTATAGGGAG  |
|                      |                | GTCCTTCCACTGAGTGAACAA   |
|                      |                | T                       |
| qPCR analysis        | dsEGFP-F       | GTGCCCATCCTGGTCGAGCT    |
|                      | dsEGFP-R       | TGCACGCTGCCGTCCTCGAT    |
|                      | dsEGFP-T7F     | TAATACGACTCACTATAGGGAG  |
|                      | dsEGFP-T7R     | GTGCCCATCCTGGTCGAGCT    |
| HO-1                 |                | TAATACGACTCACTATAGGGAG  |
|                      |                | TGCACGCTGCCGTCCTCGAT    |
| Mn-SOD               | qHO-1-F        | GCATGGCAGTGACCGAGATTGA  |
|                      | qHO-1-R        | GTCGCTGCTTCGTCTCCTCATC  |
| GPx                  | qMnSOD-F       | CTGGTTCCGTTGCTTGGC      |
|                      | qMnSOD-R       | CGCTCATTACGTTCTCCC      |
| ATG3                 | qGPx-F         | AGGGACTTCCACCAGATG      |
|                      | qGPx-R         | CAACAAC TCCCCTTCGGTA    |
| ATG4                 | qATG3-F        | TGCTCACTGCGATACTCCATT   |
|                      | qATG3-R        | CGCTGCCAAGACCAAACCATA   |
| ATG5                 | qATG4-F        | ACTTGTCTGTTTCCACTTCCGTT |
|                      |                | T                       |
|                      | qATG4-R        | CTTTGTTGGTGATGAGGTCGTCT |
|                      |                | A                       |
|                      | qATG5-F        | TGCCCTCTGTGCTTCAAACC    |
|                      | qATG5-R        | GGAACCTCACTGCCCAC TTT   |

|              |                 |                        |
|--------------|-----------------|------------------------|
| ATG10        | qATG10-F        | GGATGCTCTTGTTGCGTCAGG  |
|              | qATG10-R        | CAATCACTCGGGTAAACTTCT  |
| Caspase-3    | caspase3-F      | AACCAAGGCATCCCTGTCA    |
|              | caspase3-R      | GGGTTTATTCTGAAGTTGTGGG |
| Caspase2     | caspase2-F      | GCCGTGGTGAGGGTCTGG     |
|              | caspase2-R      | GGAATCTTGTAAGCCTGGTAGC |
|              |                 | C                      |
| EF1 $\alpha$ | EF1 $\alpha$ -F | GTATTGGAACAGTGCCCGTG   |
|              | EF1 $\alpha$ -R | ACCAGGGACAGCCTCAGTAAG  |

---
